# Supplementary material
Source: PubMed Central journal article supplement (PMC8817450)
Supplement: NIHMS1772521-supplement-1.pdf [file NIHMS1772521-supplement-1.pdf]

A

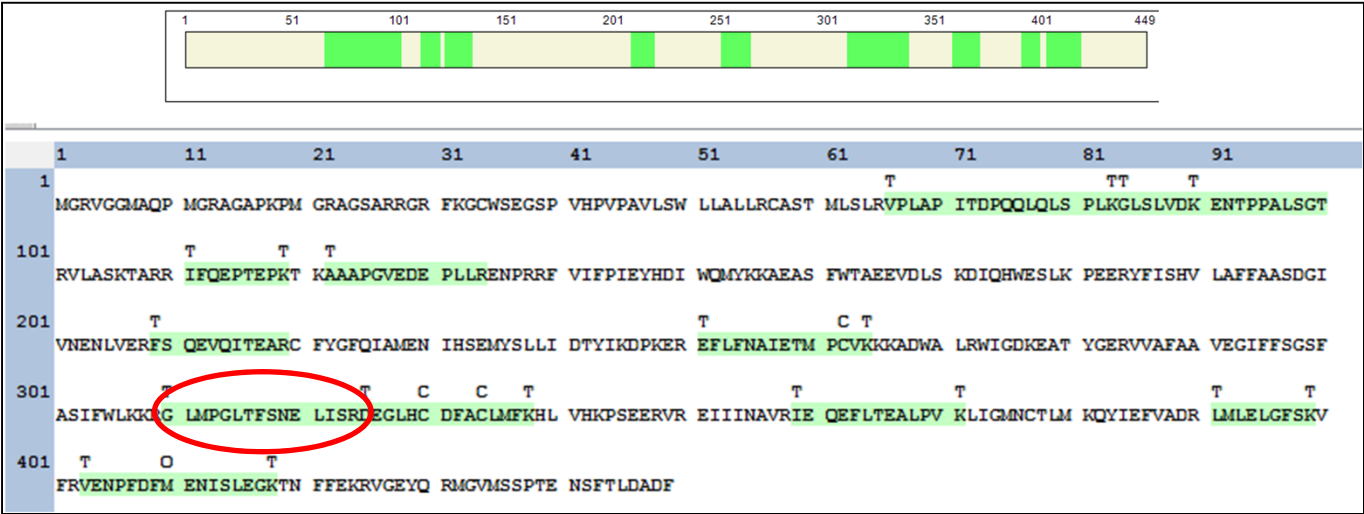

B

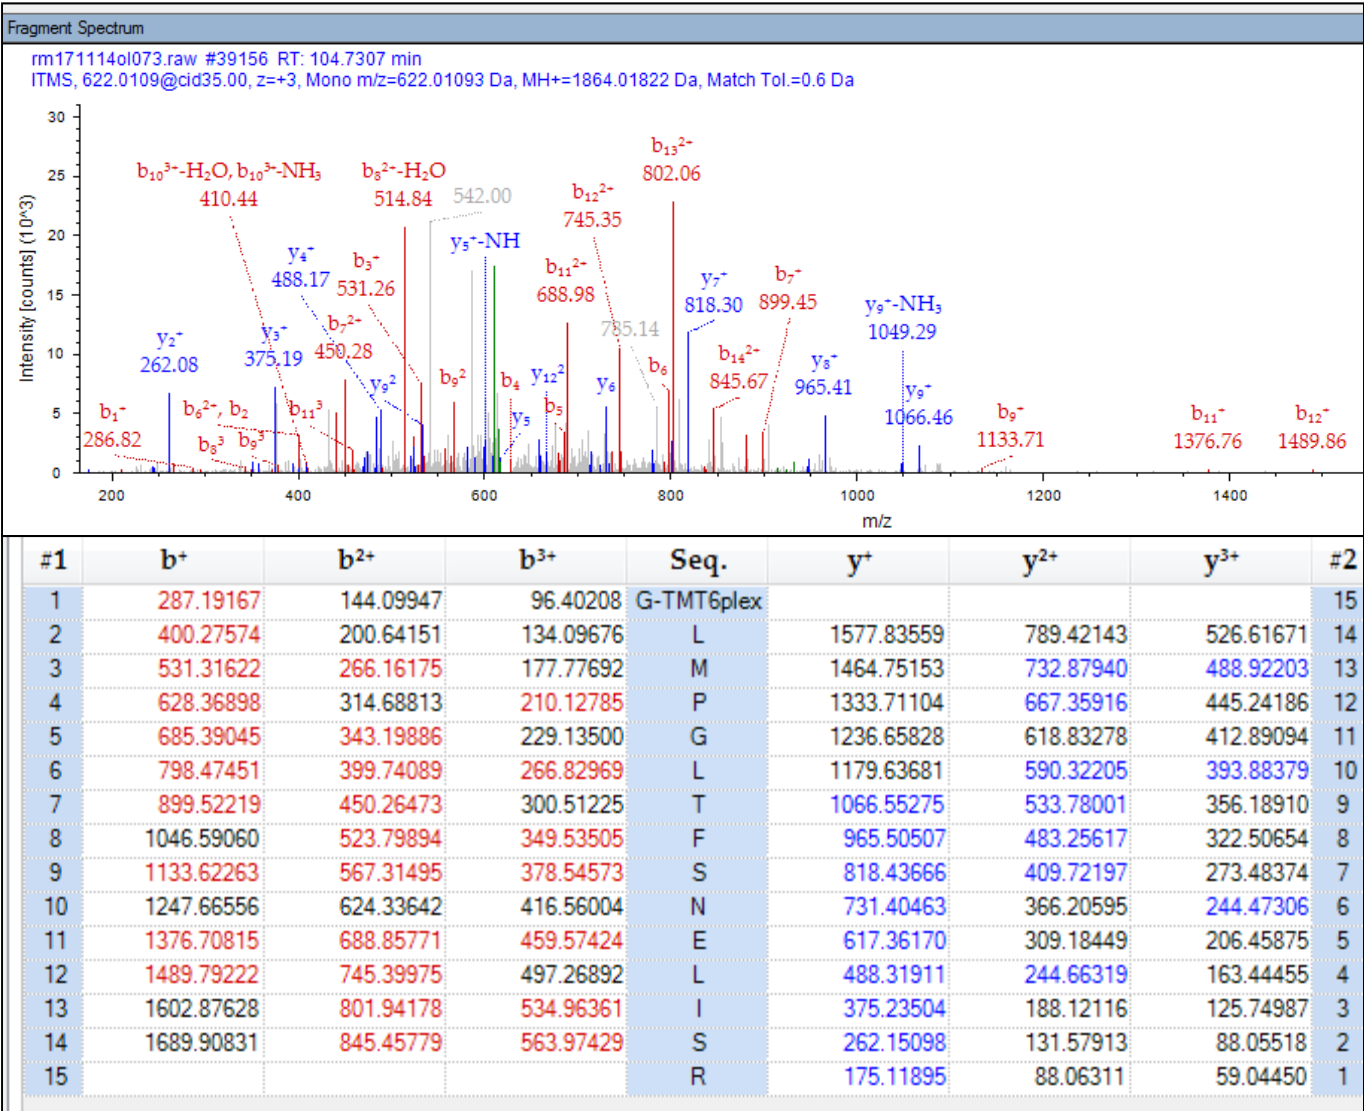



**A**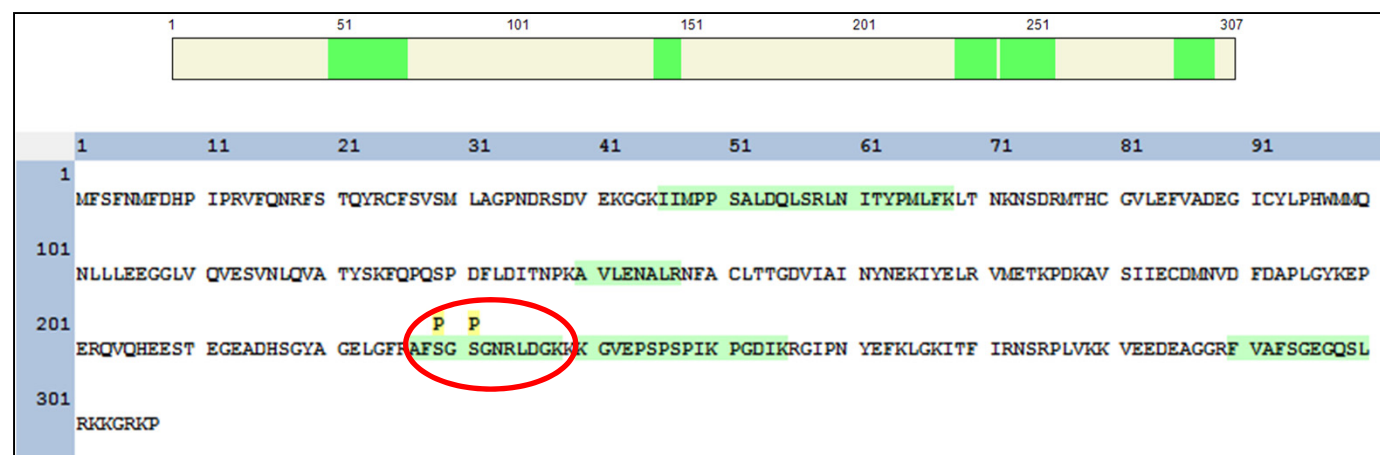**B**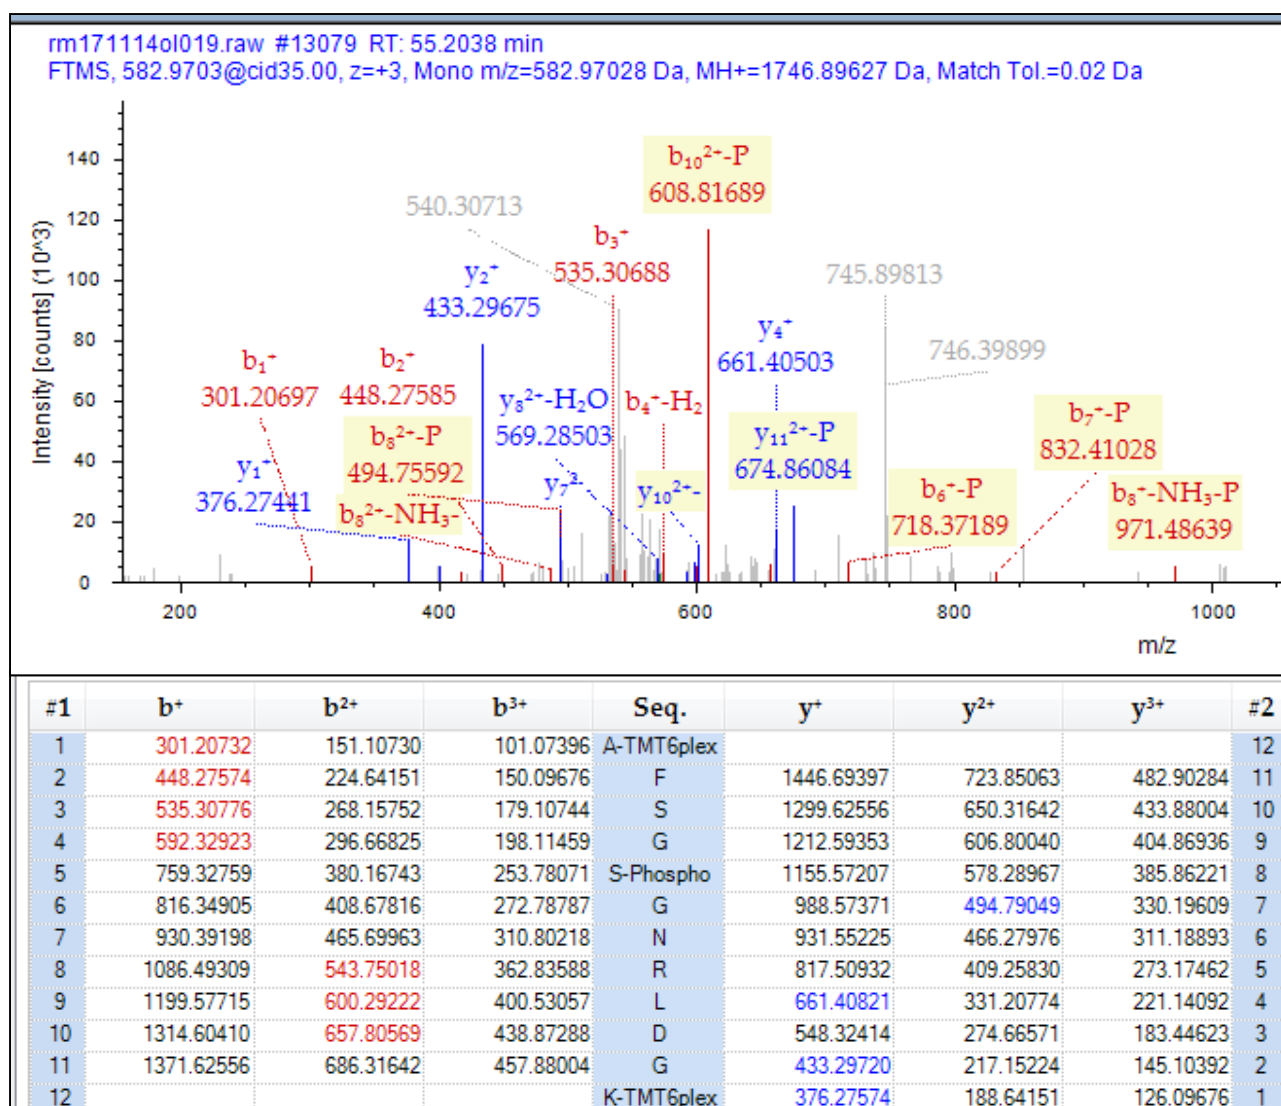

*Nagaprashantha LD et al Supplementary Fig 5*

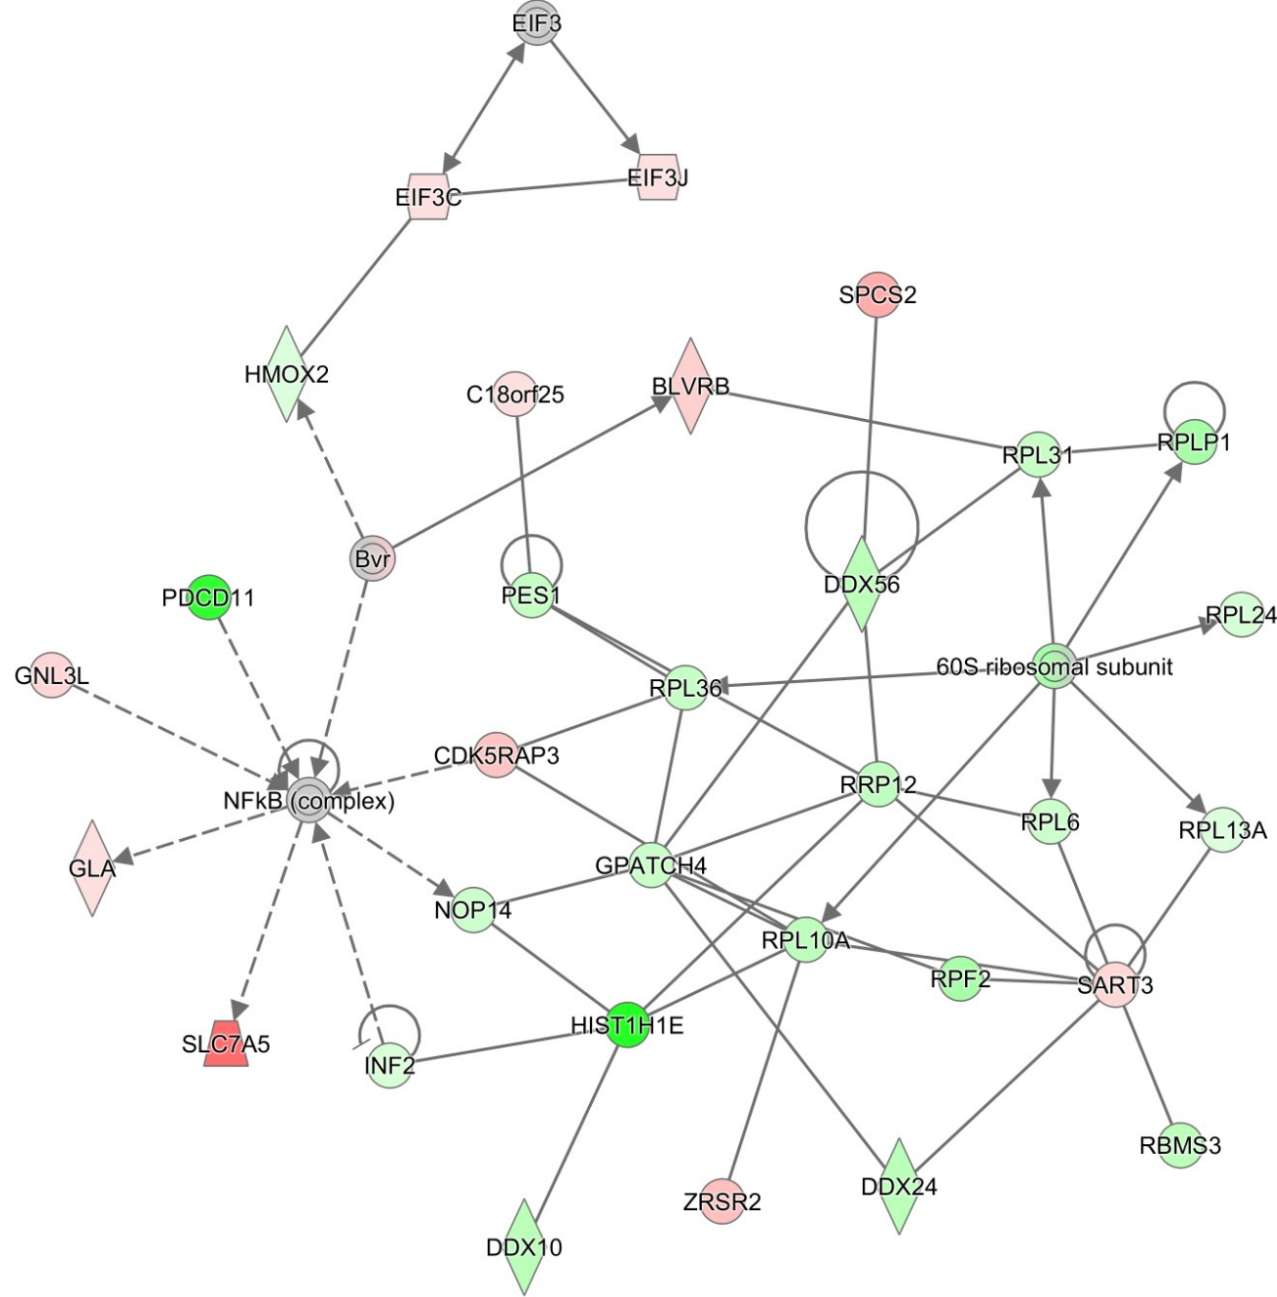

Nagaprashantha LD et al Supplementary Fig 6

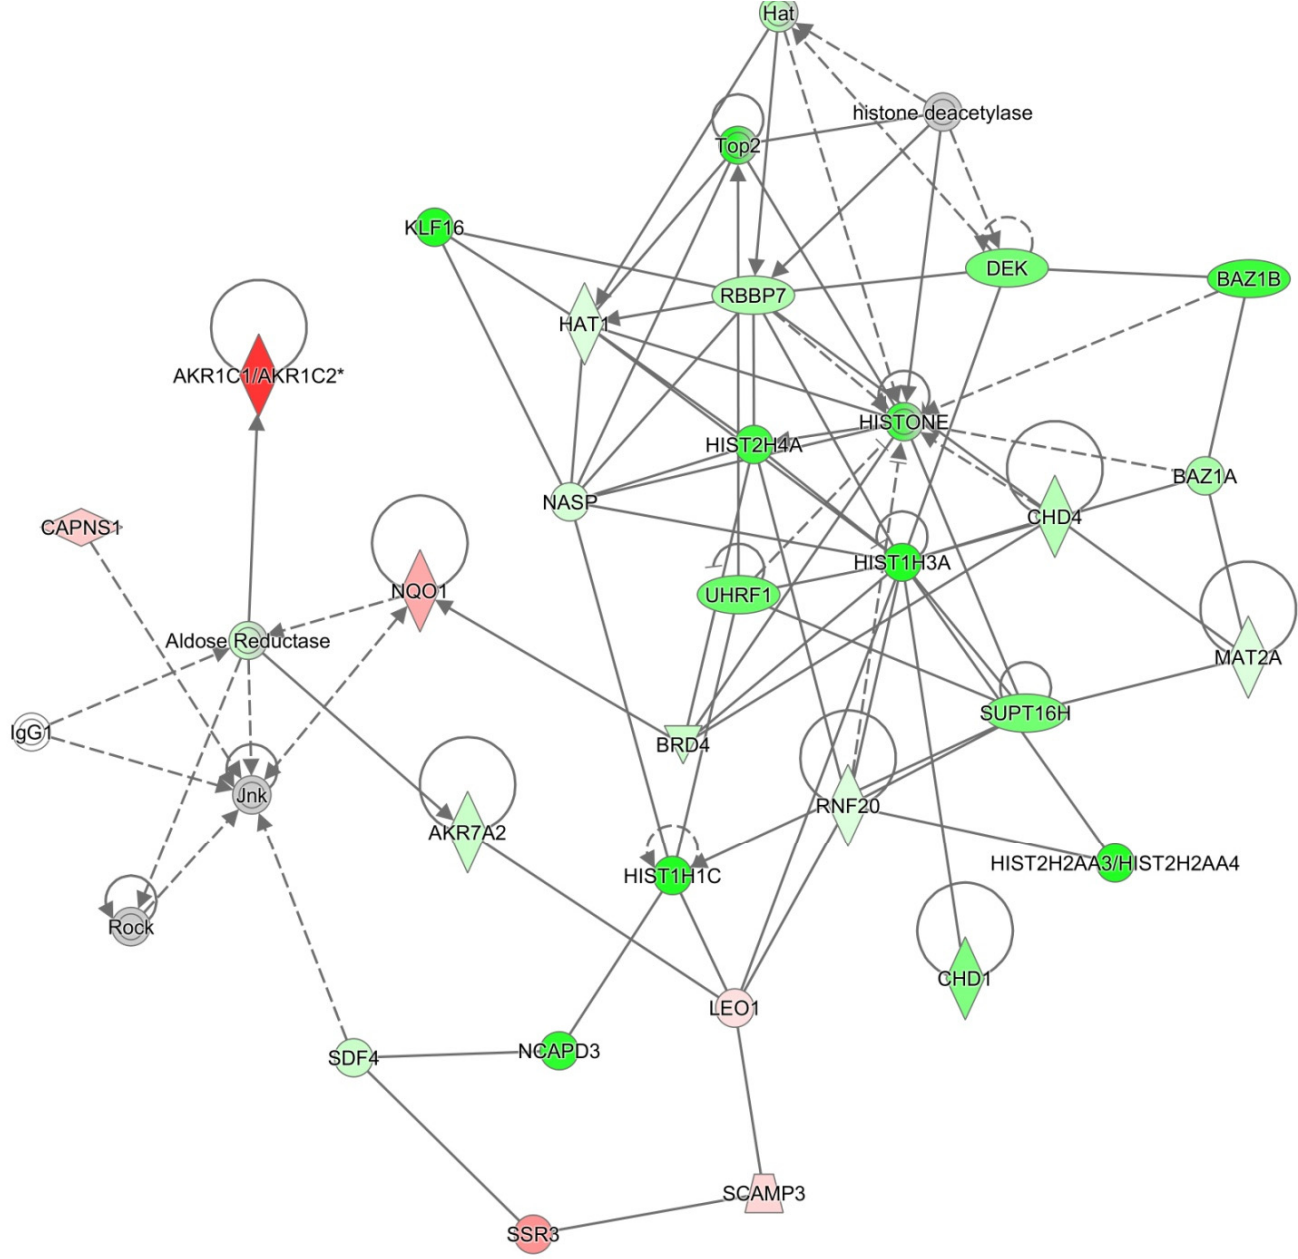

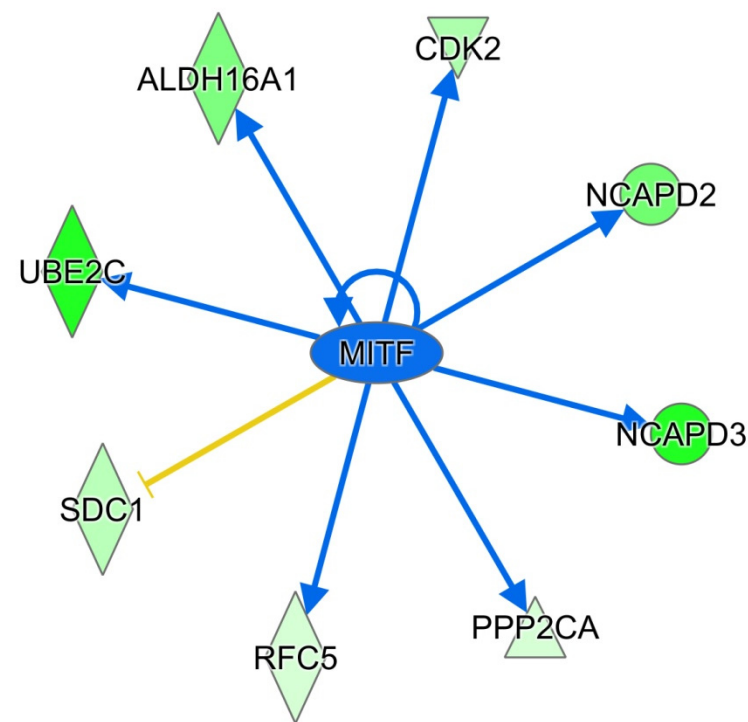

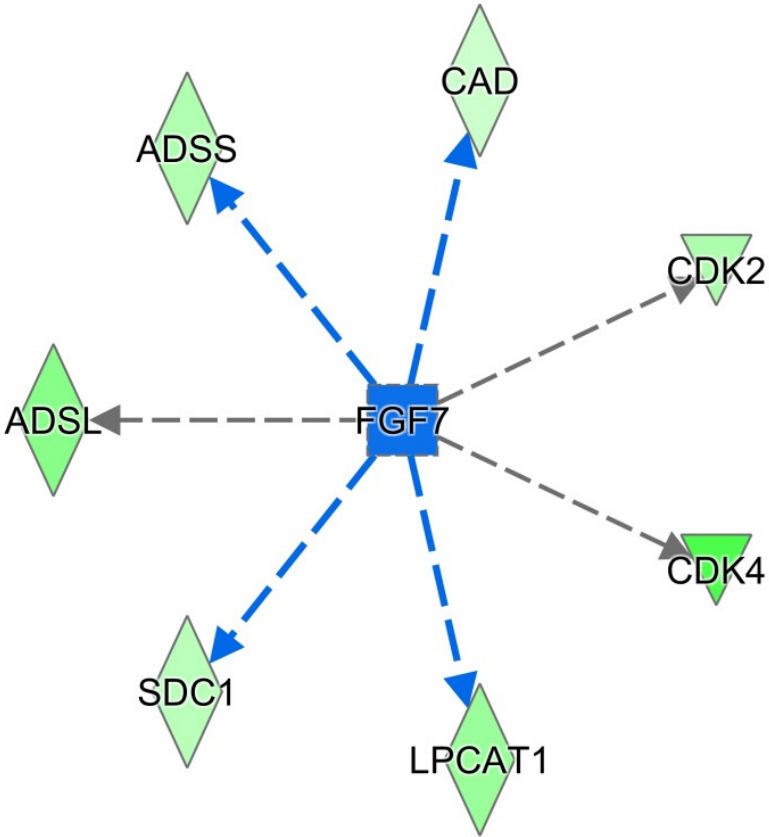

## Supplemental Figure Legends:

**Supplemental Figure S1: Identification of the non-phosphorylated protein PCNA associated isoform 1 (PAF1) peptide YAGGNPVCVRPTTPK:** *A*, The PAF1 protein showing the sequence coverage following TMT 10plex MS/MS analyses in breast cancer cells. *B*, The MS/MS spectrum obtained by Proteome Discoverer 2.2 software corresponding to PAF1 peptide YAGGNPVCVRPTTPK. The MS/MS spectra were extracted and searched using Thermo Proteome Discoverer 2.2/Sequest HT against the NCBI Homo Sapiens Reference Sequences database.

**Supplemental Figure S2: Identification of the non-phosphorylated protein ribonucleotide reductase M2 subunit (RRM2) peptide GLMPGLTFSNELISR:** *A*, The RRM2 protein showing the sequence coverage following TMT 10plex MS/MS analyses in breast cancer cells. *B*, The MS/MS spectrum obtained by Proteome Discoverer 2.2 software corresponding to RRM2 peptide GLMPGLTFSNELISRAKR. The MS/MS spectra were extracted and searched using Thermo Proteome Discoverer 2.2/Sequest HT against the NCBI Homo Sapiens Reference Sequences database.

**Supplemental Figure S3: Identification of the non-phosphorylated protein Heme Oxygenase 1 (HO1) peptide AALEQDLAFWYGPR:** *A*, The HO1 protein showing the sequence coverage following TMT 10plex MS/MS analyses in BC cells. *B*, The MS/MS spectrum obtained by Proteome Discoverer 2.2 software corresponding to HO1 peptide AALEQDLAFWYGPR. The MS/MS spectra were extracted and searched using Thermo Proteome Discoverer 2.2/Sequest HT against the NCBI Homo Sapiens Reference Sequences database.

**Supplemental Figure S4: Identification of the phosphoprotein ubiquitin fusion degradation protein 1 (UFD1) peptide AFSGp-SGNRLDGK:** *A*, The UFD1 protein showing the sequence coverage following TMT 10plex MS/MS analyses in BC cells. *B*, The MS/MS spectrum obtained by Proteome Discoverer 2.2 software corresponding to UFD1 phosphopeptide AFSGp-SGNRLDGK. The MS/MS spectra were extracted and searched using Thermo Proteome Discoverer 2.2/Sequest HT against the NCBI Homo Sapiens Reference Sequences database.

**Supplemental Figure S5: Effect of 2HF on Small Molecule Biochemistry Network in MCF7 cells.** Ingenuity Pathway Analyses (IPA) revealing the regulation of small molecule biochemistry network and associated proteins including 60S ribosomal subunit, DDX56, RPL10A, HIST1H1E, PDCD11 and HMOX2 in MCF7 breast cancer cells.

**Supplemental Figure S6: Effect of 2HF on Cell Cycle Network in MCF7 cells.** Ingenuity Pathway Analyses (IPA) revealing the regulation of cell cycle and associated proteins including HIST1HC, Top2, DEK, KLF16 and NCAPD3 in MCF7 breast cancer cells.

**Supplemental Figure S7: Effect of 2HF on MITF Network in MDA-MB231 cells.** Ingenuity Pathway Analyses (IPA) revealing the regulation of MITF network and associated proteins including CDK2, UBE2C, NCAPD3 and SDC1 in MDA-MB231 breast cancer cells.

**Supplemental Figure S8: Effect of 2HF on FGF7 Network in MDA-MB231 cells.** Ingenuity Pathway Analyses (IPA) revealing the regulation of FGF7 network and associated proteins including CDK4, CDK2, CAD and LPCAT1 in MDA-MB231 breast cancer cells.
